# Supplementary material
Source: PubMed Central journal article supplement (PMC7453974)
Supplement: NIHMS1614333-supplement-Supplemental_Material.pdf [file NIHMS1614333-supplement-Supplemental_Material.pdf]

## SUPPLEMENTAL MATERIAL

### Sickle Cell Trait and Risk of Ischemic Stroke in Young Adults

Rebecca V. Zhang, BA<sup>1</sup>; Kathleen A. Ryan, MPH<sup>2,3</sup>; Haley Lopez, BA<sup>1,2</sup>; Marcella A. Wozniak, MD, PhD<sup>1,2</sup>; Michael S. Phipps, MD, MHS<sup>1,2</sup>; Carolyn A. Cronin, MD, PhD<sup>1,2</sup>; John W. Cole, MD, MS<sup>1,2</sup>; Tara L. M. Dutta, MD<sup>1</sup>; Prachi Mehndiratta, MBBS<sup>1</sup>; Melissa Motta, MD<sup>1</sup>; Jose G. Merino, MD<sup>1</sup>; Steven J. Kittner, MD MPH<sup>2,1\*</sup>

### Supplemental Methods

#### Genotyping

We genotyped cases and controls using the Illumina HumanOmni1-Quad\_v1-0\_B BeadChip and imputed chromosome 11 into 1000 genomes, phase 3 using the Michigan Imputation Server<sup>1</sup>.

### Supplementary Tables

**Table I.** Mean Ages of Participants Per Study Cohort by SCT Status

|                                           | Our study (GEOS) | ARIC <sup>2</sup> | JHS <sup>3</sup> | MESA <sup>3</sup> | REGARDS <sup>3</sup> | WHI <sup>3</sup> |
|-------------------------------------------|------------------|-------------------|------------------|-------------------|----------------------|------------------|
| Mean age of participants with SCT (SD)    | 39.4 (8)         | 53 (6)            | 50.4 (12.3)      | 61 (10)           | 63.4 (9.4)           | 63.6 (7.1)       |
| Mean age of participants without SCT (SD) | 41.0 (6.8)       | 54 (6)            | 50.2 (11.9)      | 62.0 (10.0)       | 63.8 (9.2)           | 63.2 (7.1)       |

### Supplementary References

1. Li Y, Willer C, Sanna S, Abecasis G. Genotype imputation. *Annu Rev Genomics Hum Genet.* 2009;10:387-406.
2. Caughey MC, Loehr LR, Key NS, Derebail VK, Gottesman RF, Kshirsagar AV, et al. Sickle Cell Trait and Incident Ischemic Stroke in the Atherosclerosis Risk in Communities (ARIC) Study. *Stroke J Cereb Circ.* 2014;45:2863-2867.
3. Hyacinth HI, Carty CL, Seals SR, Irvin MR, Naik RP, Burke GL, et al. Association of Sickle Cell Trait With Ischemic Stroke Among African Americans: A Meta-analysis. *JAMA Neurol.* 2018;75:802-807.
